# Supplementary material
Source: publisher figshare collection journal article supplement (https://acs.figshare.com/ndownloader/files/10615471)
Supplement: Supplementary file 1 [file 10615471]

# Supporting Information: Model formulation and optimization of the mechanical variables for heat exchanger design

Carolina Borges de Carvalho,<sup>†</sup> Esdras P. Carvalho,<sup>‡</sup> and Mauro A. S. S. Ravagnani<sup>\*,†</sup>

<sup>†</sup>*Department of Chemical Engineering, State University of Maringá, Maringá - Brazil*

<sup>‡</sup>*Department of Mathematics, State University of Maringá, Maringá - Brazil*

E-mail: massravagnani@uem.br

The model for design of shell and tube HE is formulated as a MINLP optimization problem already presented by Ravagnani and Caballero<sup>1</sup>.

Only the mechanical aspects are considered in this paper, since thermo fluid variables were obtained for each modeling cell regarding temperature distribution.

For the mechanical variables of the heat exchanger, Table 1 containing the respective values for tube was constructed according to the TEMA standards. This table contains two types of external diameter for the tubes (19.05 and 25.4 *mm*), two types of geometric arrangement, three options for pitch (23.79, 25.4 and 31.75 *mm*), five types of number of tube passes, 1, 2, 4, 6, or 8, and 21 different types of shell and tube bundles diameter, ranged from 0.205 *m* and 0.173 *m* to 1.524 *m* and 1.473 *m*, respectively, with 565 rows.

To find  $D_s$ ,  $D_3$ ,  $D_2$ ,  $a_{rr}$ ,  $pt$ ,  $N_{tp}$  and  $n_b$ , the following equations are used (Eqs. 1 - 8):

$$D_s = \sum_{i=1}^{565} D_{si} y_{int}(i) \quad (1)$$

Table 1: Tube counting table

| $D_s$ (m) | $D_3$ (m) | $D_2$ (m) | $a_{rr}$    | $pt$ (m) | Number of tube passes |          |          |          |      |
|-----------|-----------|-----------|-------------|----------|-----------------------|----------|----------|----------|------|
|           |           |           |             |          | 1                     | 2        | 4        | 6        | 8    |
| 0.20500   | 0.17325   | 0.01905   | $\triangle$ | 0.02379  | 38                    | 32       | 26       | 24       | 18   |
|           |           | 0.01905   | $\square$   | 0.02540  | 32                    | 26       | 20       | 20       |      |
|           |           | 0.01905   | $\triangle$ | 0.02540  | 37                    | 30       | 24       | 16       |      |
|           |           | 0.02540   | $\square$   | 0.03175  | 21                    | 16       | 16       | 14       |      |
|           |           | 0.02540   | $\triangle$ | 0.03175  | 22                    | 18       | 16       | 14       |      |
| 0.2543    | 0.22276   | 0.01905   | $\triangle$ | 0.02379  | 62                    | 56       | 47       | 42       | 36   |
|           |           | 0.01905   | $\square$   | 0.02540  | 52                    | 52       | 40       | 36       |      |
|           |           | 0.01905   | $\triangle$ | 0.02540  | 61                    | 52       | 48       | 48       |      |
|           |           | 0.02540   | $\square$   | 0.03175  | 32                    | 32       | 26       | 24       |      |
|           |           | 0.02540   | $\triangle$ | 0.03175  | 37                    | 32       | 28       | 28       |      |
| $\vdots$  | $\vdots$  | $\vdots$  | $\vdots$    | $\vdots$ | $\vdots$              | $\vdots$ | $\vdots$ | $\vdots$ |      |
| 1.42240   | 1.3716    | 0.01905   | $\triangle$ | 0.02379  | 2704                  | 2660     | 2556     | 2526     | 2489 |
|           |           | 0.01905   | $\square$   | 0.02540  | 2241                  | 2214     | 2167     | 2142     | 2110 |
|           |           | 0.01905   | $\triangle$ | 0.02540  | 2588                  | 2545     | 2446     | 2409     | 2373 |
|           |           | 0.02540   | $\square$   | 0.03175  | 1420                  | 1400     | 1371     | 1333     | 1307 |
|           |           | 0.02540   | $\triangle$ | 0.03175  | 1638                  | 1605     | 1549     | 1501     | 1472 |
| 1.52400   | 1.47300   | 0.01905   | $\triangle$ | 0.02379  | 3399                  | 3343     | 3232     | 3195     | 3162 |
|           |           | 0.01905   | $\square$   | 0.02540  | 2587                  | 2556     | 2510     | 2485     | 2460 |
|           |           | 0.01905   | $\triangle$ | 0.02540  | 2987                  | 2945     | 2827     | 2798     | 2770 |
|           |           | 0.02540   | $\square$   | 0.03175  | 1639                  | 1615     | 1587     | 1553     | 1522 |
|           |           | 0.02540   | $\triangle$ | 0.03175  | 1889                  | 1851     | 1797     | 1761     | 1726 |

$$D_3 = \sum_{i=1}^{565} D_{3i} ynt(i) \quad (2)$$

$$D_2 = \sum_{i=1}^{565} D_{2i} ynt(i) \quad (3)$$

$$a_{rr} = \sum_{i=1}^{565} a_{rri} ynt(i) \quad (4)$$

$$pt = \sum_{i=1}^{565} pt_i ynt(i) \quad (5)$$

$$N_{tp} = \sum_{i=1}^{565} N_{tpi} y_{nt}(i) \quad (6)$$

$$n_b = \sum_{i=1}^{565} n_{bi} y_{nt}(i) \quad (7)$$

$$\sum_{i=1}^{565} y_{nt}(i) = 1 \quad (8)$$

Five kinds of tube length are considered ( $L$ ):

$$N_L = \left[ 2.438 \quad 3.658 \quad 4.877 \quad 6.096 \quad 6.706 \right],$$

$$L = 2.438y_1^L + 3.658y_2^L + 4.877y_3^L + 6.096y_4^L + 6.706y_5^L \quad (9)$$

$$\sum_{i=1}^5 y_i^L = 1. \quad (10)$$

Baffle spacing ( $l_s$ ) is defined between  $D_s$  and  $D_s/5$ :

$$\frac{D_s}{5} \leq l_s \leq D_s, \quad (11)$$

and, then, the number of baffles ( $N_{bf}$ ) is:

$$N_{bf} = \frac{L}{l_s} - 1. \quad (12)$$

Tube inside diameter ( $D_1$ ) is obtained for different values of tube external diameter ( $D_2$ ) and BWG (Birmingham Wire Gage), factor used by TEMA to define wall tube thickness. For the considered  $D_2$  values there are two sets of  $D_1$  values (Table 2).

Table 2: Determination of tube inside diameter for different values of tube external diameter

| $D_2 = 0.01905m$ |           | $D_2 = 0.02504m$ |           |
|------------------|-----------|------------------|-----------|
| BWG              | $D_1 (m)$ | BWG              | $D_1 (m)$ |
| 10               | 0.0122    | 8                | 0.0170    |
| 11               | 0.0129    | 9                | 0.0179    |
| 12               | 0.0135    | 10               | 0.0186    |
| 13               | 0.0142    | 11               | 0.0193    |
| 14               | 0.0148    | 12               | 0.0199    |
| 15               | 0.0154    | 13               | 0.0206    |
| 16               | 0.0157    | 14               | 0.0212    |
| 17               | 0.0161    | 15               | 0.0217    |
| 18               | 0.0166    | 16               | 0.0221    |
|                  |           | 17               | 0.0225    |
|                  |           | 18               | 0.0229    |

$$BWG_1 = \sum_{j=1}^9 y_{1j}^{bwg} BWG_j^1 \quad (13)$$

$$\sum_{j=1}^9 y_{1j}^{bwg} \leq 1 \quad (14)$$

$$BWG_2 = \sum_{j=1}^{11} y_{2j}^{bwg} BWG_j^2 \quad (15)$$

$$\sum_{j=1}^{11} y_{2j}^{bwg} \leq 1 \quad (16)$$

$$BWG = BWG_1 + BWG_2 \quad (17)$$

For the heat load ( $Q$ ), as hot fluid flows in shell side:

$$Q = M_s C_{ps} (T_{si} - T_{so}) \quad (18)$$

or

$$Q = M_t C_{pt} (T_{to} - T_{ti}). \quad (19)$$

For the log mean temperature difference, the Chen approximation was used<sup>3</sup>:

$$LMTD = \left( \frac{t_1 t_2 (t_1 + t_2)}{2} \right)^{\frac{1}{3}}, \quad (20)$$

$$t_1 = T_{so} - T_{ti} \quad (21)$$

$$t_2 = T_{si} - T_{to}. \quad (22)$$

For  $F_t$  determination, the correlation proposed by Blackwell and Haydu<sup>4</sup> was used.

Finally, the objective function is defined as an area minimization problem:

$$A = n_b \pi D_2 L. \quad (23)$$

## References

- (1) Ravagnani, M. A. S. S.; Caballero, J. A. A MINLP Model for the Shell and Tube Heat Exchangers Design Using TEMA Standards. *Chemical Engineering Research and Design* **2007**, *85(A10)*, 1423–1435.
- (2) Standards of the Tubular Exchangers Manufacturers Association. TEMA: New York, 2007.
- (3) Chen, J. J. Letter to the editor: comments on improvement on a replacement for the logarithmic mean. *Chemical Engineering Science* **1987**, *42*, 2488.
- (4) Blackwell, W. W.; Haydu, L. Calculating the correct LMTD in shell-and-tube heat exchangers. *Chemical Engineering* **1981**, *88*, 101–106.
